# Supplementary material for: Competition between covalent and noncovalent bond cleavages in dissociation of phosphopeptide-amine complexes
Source: Royal Society of Chemistry journal article supplement (doi:10.1039/c1cp00029b), 2011-01-01
Supplement: c1cp00029b.pdf [file c1cp00029b.pdf]

**The Energetics of Covalent and Non-covalent Binding in Complexes Containing Phosphate and Cationic Amino Groups**

Julia Laskin, Zhibo Yang and Amina S. Woods

**Supporting Information**

Complete reference 41:

(41) E. J. Bylaska, W. A. de Jong, N. Govind, K. Kowalski, T. P. Straatsma, M. Valiev, D. Wang, E. Apra, T. L. Windus, J. Hammond, P. Nichols, S. Hirata, M. T. Hackler, Y. Zhao, P.-D. Fan, R. J. Harrison, M. Dupuis, D. M. A. Smith, J. Nieplocha, V. Tipparaju, M. Krishnan, Q. Wu, T. Van Voorhis, A. A. Auer, M. Nooijen, E. Brown, G. Cisneros, G. I. Fann, H. Fruchtl, J. Garza, K. Hirao, R. Kendall, J. A. Nichols, K. Tsemekhman, K. Wolinski, J. Anchell, D. Bernholdt, P. Borowski, T. Clark, D. Clerc, H. Dachsel, M. Deegan, K. Dyllal, D. Elwood, E. Glendening, M. Gutowski, A. Hess, J. Jaffe, B. Johnson, J. Ju, R. Kobayashi, R. Kutteh, Z. Lin, R. Littlefield, X. Long, B. Meng, T. Nakajima, S. Niu, L. Pollack, M. Rosing, G. Sandrone, M. Stave, H. Taylor, G. Thomas, J. van Lenthe, A. Wong, and Z. Zhang, "*NWChem, A Computational Chemistry Package for Parallel Computers, Version 5.1*" (2007), Pacific Northwest National Laboratory, Richland, Washington 99352-0999, USA

Figure S1

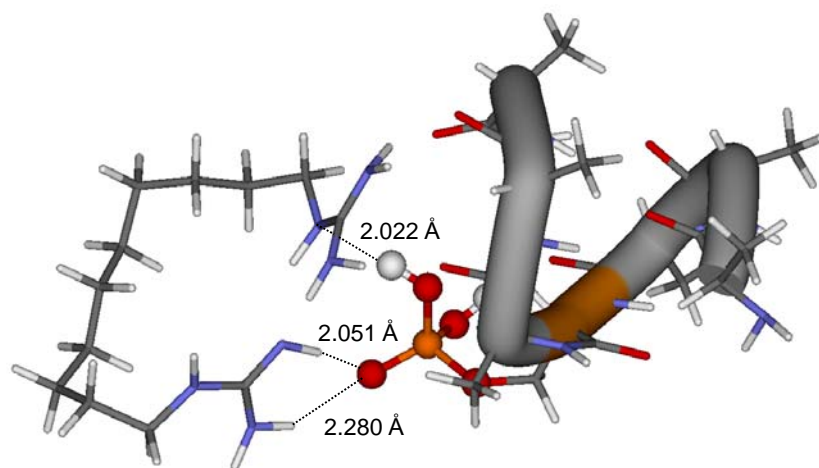

[DGD+H][A<sub>3</sub>pSA<sub>3</sub>-NH<sub>2</sub>]

16.8 kcal/mol

B3LYP/6-31++G(d,p)//B3LYP/6-31G(d) with ZPE correction

Figure S1. The canonical structure [DGD+H]<sup>+</sup>[A<sub>3</sub>pSA<sub>3</sub>-NH<sub>2</sub>]<sup>-</sup>, of the DGD- A<sub>3</sub>pSA<sub>3</sub>-NH<sub>2</sub> complex.
